# Supplementary material
Source: PubMed Central journal article supplement (PMC4878152)
Supplement: 10-1055-s-0034-1383314-sup_gf858.pdf [file 10-1055-s-0034-1383314-sup_gf858.pdf]

# S1-Leitlinie: Vorgehen bei Terminüberschreitung und Übertragung

Kurzfassung\* – AWMF-Register-Nummer: 015/065

S1-Guideline: Management of Late-term and Post-term Pregnancy

Short version\* – AWMF Registry Number: 015/065

## Autoren

E. Weiss (LL Koordination)<sup>1</sup>, H. Abele<sup>2</sup>, C. Bartz<sup>3</sup>, M. Franz<sup>4</sup>, T. Fischer<sup>5</sup>, U. Gembruch<sup>6</sup>, M. Gonser<sup>7</sup>, K. Heim<sup>8</sup>, F. Kainer<sup>9</sup>, A. Kiefer<sup>10</sup>, K. König<sup>11</sup>, B. Ramsauer<sup>12</sup>, F. Reister<sup>13</sup>, K. T. M. Schneider<sup>14</sup>, D. Surbek<sup>15</sup>, K. Vetter<sup>12</sup>, F. Wolff<sup>16</sup>

## Institute

Die Institutsangaben sind am Ende des Beitrags gelistet.

## 1 Geltungsbereich und Zweck der Leitlinie

### 1.1 Problembeschreibung

Die normale Schwangerschaft dauert, berechnet nach dem 1. Tag der letzten Regelblutung, im Mittel **280 Tage** oder **40 + 0 Schwangerschaftswochen (SSW)**. Ab einer Verlängerung um 14 Tage, also ab **294 Tagen** oder **42 + 0 SSW**, spricht man gemäß WHO und FIGO von einer zeitlichen **Übertragung**. Im deutschen Sprachraum ist für die Zeit von 40 + 0 bis 41 + 6 SSW der Begriff **Terminüberschreitung** üblich.

Mehr als 40% aller Schwangeren gebären nach dem errechneten Geburtstermin. Das Management im Fall eines Ausbleibens des Geburtseintritts bewegt sich zwischen einem expektativen Vorgehen mit intensiver Überwachung von Mutter und Kind und der Indizierung einer Geburtseinleitung.

### 1.2 Patientenzielgruppe

Diese Leitlinie bezieht sich auf die große Gruppe risikoarmer Einlingsschwangerschaften ohne spezifische Schwangerschaftsrisiken (z. B. Gestationsdiabetes, Präeklampsie oder IUGR).

### 1.3 Anwenderzielgruppe und Versorgungsbereich

Ziel dieser Leitlinie ist es, bei Überschreitung des errechneten und verifizierten Geburtstermins sowohl den niedergelassenen Fachärzten als auch den in der Geburtsklinik tätigen Ärzten eine evidenzbasierte Entscheidungsgrundlage für die Beratung und Betreuung der Schwangeren an die Hand zu geben. In dieser Leitlinie wird zwischen Terminüberschreitung (40 + 0 SSW bis 41 + 6 SSW)

und der Übertragung (ab 42 + 0 SSW) differenziert.

## 2 Epidemiologie, Pathophysiologie und Klinik

### 2.1 Inzidenz

Die Häufigkeit der Übertragung beträgt in den nach 1995 publizierten Arbeiten aus England und den USA 4,4–5,3%. Daten aus Schweden zeigen trotz Ultraschallscreening vor 20 SSW eine Häufigkeit von 6,5%.

In Deutschland, Österreich und der Schweiz ist ein flächendeckendes Angebot einer Untersuchung mittels Sonografie im 1. Trimester seit Jahren eingeführt. Damit wird eine genauere (im Vergleich zur Berechnung nach der letzten Menstruation) Terminbestimmung erreicht, sodass die dann noch zu verzeichnenden Schwangerschaften  $\geq 42 + 0$  Wochen „echte zeitliche Übertragungen“ darstellen. Die Daten des Instituts für angewandte Qualitätsförderung und Forschung im Gesundheitswesen in Deutschland (AQUA) im Jahr 2011 zeigen ein Schwangerschaftsalter bei Entbindung von 42 + 0 Wochen und darüber nur in 0,61% der Fälle (3965 von 650597 Geborenen). Eine Überschreitung des errechneten Geburtstermins wird in 37,1% dokumentiert.

### 2.2 Ätiologie und Pathogenese

Die Ätiologie der Übertragung ist bisher nicht weitreichend erforscht. Als Einflussfaktoren werden Primigravidität, niedriger sozioökonomischer Status, BMI > 35 und männliches Geschlecht des Feten diskutiert.

## Bibliografie

DOI <http://dx.doi.org/10.1055/s-0034-1383314>  
Geburtsh Frauenheilk 2014; 74:  
1–5 © Georg Thieme Verlag KG  
Stuttgart · New York ·  
ISSN 0016-5751

## Korrespondenzadresse

**PD Dr. med. Erich Weiss**  
Klinikverbund Südwest  
Kliniken Böblingen  
Frauenklinik  
Bunsenstrasse 120  
71032 Böblingen  
e.weiss@  
klinikverbund-suedwest.de

## DGGG-Leitliniensekretariat

**Prof. Dr. med. Matthias W. Beckmann,**  
**DGGG-Leitlinienbeauftragter**  
Frauenklinik  
Universitätsklinikum Erlangen  
Universitätsstrasse 21–23  
91054 Erlangen  
Tel.: 091 31-85-33507/44063  
Fax: 091 31-85-33951

\* **Hinweis:** Die Langversion einschließlich des kompletten Literaturverzeichnisses und des Leitlinienreports kann auf der Homepage der AWMF ([www.awmf.org](http://www.awmf.org)) eingesehen werden.

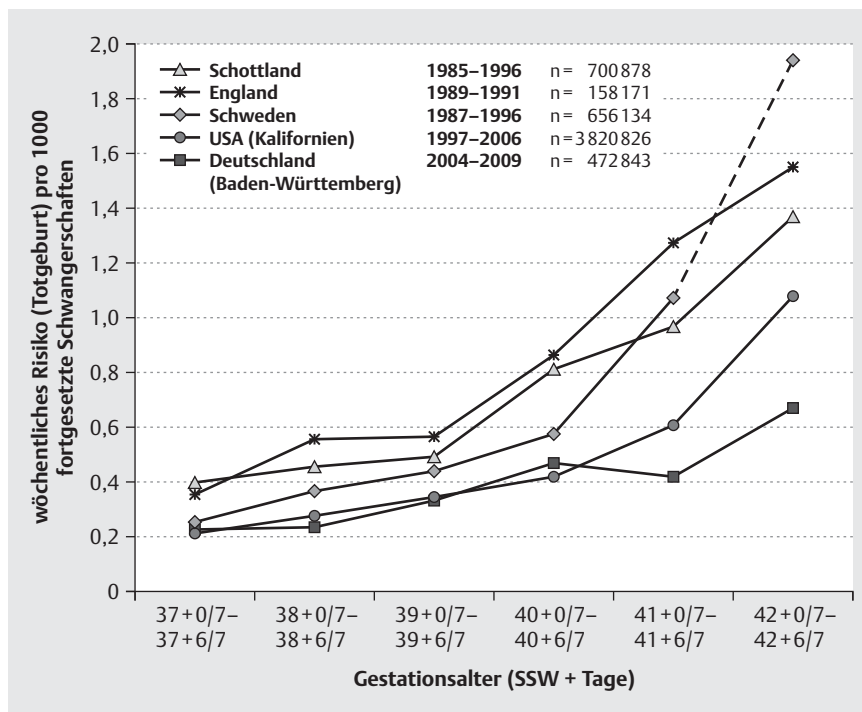

**Abb. 1** Wöchentliches Risiko für eine Totgeburt pro 1000 fortgesetzte Schwangerschaften am Beginn der jeweiligen Woche im internationalen Vergleich: Schottland [Smith 2001]; England [Hilder 1998]; Schweden [Divon 2004]; Kalifornien [Rosenstein 2012]; Baden-Württemberg [Weiss 2013]. Fisher's Exact Test für SSW 41 + 0–41 + 6: Baden-Württemberg vs. Schottland, England und Schweden:  $p < 0,001$ ; Baden-Württemberg vs. Kalifornien:  $p < 0,05$ .

### 2.3 Pathophysiologische Aspekte

Bei einer Überschreitung des errechneten Geburtstermins spielt die verbleibende Plazentafunktion bzw. deren Reservekapazität eine bedeutende Rolle. Die Plazenta vermag trotz abnehmender Wachstumsgeschwindigkeit im 3. Trimenon ihre funktionelle Kapazität durch verschiedene Anpassungsmechanismen beträchtlich zu steigern.

Bleibt die Plazentafunktion über den Geburtstermin hinaus unbeeinträchtigt, so resultiert daraus eine fortschreitende fetale Gewichtszunahme. Daraus erklärt sich die höhere Rate Neugeborener über 4000 g ab 42 + 0 SSW von 20–25% im Vergleich zur Geburt mit 40 + 0 SSW. Das Risiko für ein Geburtsgewicht über 4499 g beträgt bereits ab 41 + 0 SSW das 3,5-Fache der Geburt am errechneten Termin (OR = 3,5; 95%-KI 3,4–3,7). Dies birgt sowohl für die Mutter als auch für den Feten geburtshilfliche Risiken (protrahierter Geburtsverlauf, vaginal-operative Entbindung, ausgedehntere mütterliche Weichteilverletzungen, Schulterdystokie, kindliche Klavikulafraktur, Plexusparese).

Ausreichend belegt ist, dass eine verminderte Fruchtwassermenge ein Hinweiszeichen für eine Plazentainsuffizienz darstellt und mit einer erhöhten perinatalen Morbidität assoziiert ist (Nabelschnurkompression bei Oligohydramnion, pathologisches CTG sub partu, Mekoniumaspiration).

### 2.4 Perinatale Mortalität und Morbidität bei Terminüberschreitung und Übertragung

Die Reservekapazität der Plazenta ist bezüglich der perinatalen Mortalität und Morbidität des Neonaten ein entscheidender Faktor bei der Überschreitung des errechneten Geburtstermins. Sowohl weiteres Wachstum des Feten, bei ausreichender Reserve, als auch verminderte placentare Versorgung können die kindliche Morbidität und Mortalität erhöhen. Diese Risiken treten aber nicht erst mit Erreichen eines Gestationsalters von 42 + 0 SSW auf. Vielmehr handelt es sich um ein kontinuierlich ansteigendes Risiko des intrauterinen Fruchttodes, des subpartalen oder neonatalen Todes und der neonatalen Morbidität (Aspiration, Nabel-

schnurkomplikation, Asphyxie prä-, sub- und postnatal, Pneumonie, Sepsis, neurologische Geburtstraumata, periphere Nervenschädigungen und Frakturen).

#### 2.4.1 Perinatale Mortalität

In mehreren großen retrospektiven Untersuchungen aus Skandinavien, England und den USA konnte – bei Analyse des Risikos der fortgesetzten Schwangerschaften – gezeigt werden, dass das fetale Risiko, intrauterin zu versterben, mit 38 SSW am niedrigsten ist und danach mit zunehmendem Gestationsalter immer steiler ansteigt. Insbesondere Feten von Schwangeren mit einem Alter von über 35 Jahren und Erstparität scheinen am höchsten durch einen IUFT ab 40 SSW gefährdet.

Aktuelle Daten aus Baden-Württemberg zeigen allerdings einen deutlich flacheren Anstieg der Rate an Totgeburten insbesondere zwischen 41 + 0 und 41 + 6 SSW. Ab 42 + 0 ist auch hier das Risiko deutlich ansteigend (Abb. 1).

##### 2.4.1.1 Einfluss anderer mütterlicher Risikokonstellationen auf die fetale Mortalität

Von den nicht schwangerschaftsbedingten Risikofaktoren, Adipositas, mütterliches Alter, Parität und Nikotinabusus, ist die Adipositas der Mutter (BMI zu Beginn der Schwangerschaft  $\geq 30 \text{ kg/m}^2$ ) in 8–18% signifikant mit einem IUFT assoziiert, das mütterliche Alter über 35 Jahre ist in 7–11%, der Nikotinabusus in 4–7% und die Erstparität in bis zu 15% mit einem IUFT in Zusammenhang zu bringen.

#### 2.4.2 Kindliche Morbidität

Ein Anstieg schwerer kindlicher Azidosen (Nabelarterien pH  $< 7,0$  und Base Excess  $> -12$ ) wird bereits ab 40 + 0 SSW beschrieben, ebenso eine erhöhte Rate an Mekoniumaspiration und ein Anstieg der Schulterdystokie. Damit gilt auch für die Morbidität des Neugeborenen ebenso wie für die Mortalität, dass diese nicht mit Erreichen eines Gestationsalters von 42 + 0 SSW plötzlich auftritt. Die meisten Morbiditätsrisiken steigen kontinuierlich

an. Prinzipiell korrelieren diese mit der Plazentafunktion und zwar derart, dass eine verminderte placentare Reserve das Risiko für hypoxieinduzierte Komplikationen erhöht, während sich bei ungestörter placentarer Reserve ein fortschreitendes fetales Wachstum auch bei Überschreitung des Geburtstermins zeigt und mit Komplikationen bedingt durch die zunehmende fetale Größe zu rechnen ist.

Aus Deutschland und Österreich stehen uns zu dieser Fragestellung Daten der Perinatalerhebungen zur Verfügung: Sie zeigen eine Verdoppelung der Azidosen zwischen 37 + 0 und 42 + 6 SSW. Die Häufigkeit der fetalen Makrosomie zeigt einen Anstieg der Neugeborenen über 4000 g von 7% mit 39 + 0 bis 39 + 6 SSW auf über 22% mit 42 + 0 bis 42 + 6 SSW.

#### 2.4.3 Mütterliche Morbidität

Zwischen 40 + 0 SSW und 41 + 6 SSW steigt die Sectiorate von 20 auf 34% und die vaginal operative Entbindungsrate von 8,5 auf 15,5% fast kontinuierlich an. Der ansteigende Anteil makrosomer Feten dürfte dabei eine wichtige Rolle spielen. Auch die höhere Anzahl von Dammrissen III° oder IV°, postpartaler Nachblutungen und protrahierten Geburtsverläufen müssen als eine Folge der ansteigenden Rate an Neugeborenen über 4000 g interpretiert werden.

### 3 Empfehlungen

#### 3.1 Allgemeine Grundsätze

Vorgeschlagen wird ein risikoadaptiertes und individualisiertes Vorgehen in Absprache mit der Schwangeren.

#### 3.2 Aufklärung der Schwangeren

Eine Aufklärung der Schwangeren soll die individuelle Risikosituation berücksichtigen. Das Vorliegen eines BMI über 30 kg/m<sup>2</sup> erhöht das Risiko für einen IUFT unabhängig von einer Terminüberschreitung um den Faktor 1,6 und soll bei der Beratung neben anderen Risikofaktoren der Schwangeren für einen IUFT (Alter, Parität, Nikotinabusus) in die Aufklärung einbezogen werden. Die Morbiditätsrisiken von Mutter und Kind durch das in Abhängigkeit des Grades der Terminüberschreitung fortschreitende Wachstum des Feten sollte ebenfalls besprochen werden.

Für den Fall einer Einleitungsindikation ist eine Aufklärung über den zu erwartenden Zeitrahmen (im Einzelfall nicht vorhersehbar) und die geplante bzw. empfohlene Einleitungsprozedur notwendig. Die durch eine Einleitung nicht erhöhte Rate an Kaiserschnitten sollte zur Beruhigung der Schwangeren ebenfalls erwähnt werden.

#### 3.3 Empfehlungen zur Diagnostik

Eine frühzeitige und möglichst exakte Feststellung des Gestationsalters ist entscheidend.

Bei der Diagnostik einer möglichen relativen Plazentainsuffizienz bei der Terminüberschreitung ist bislang keine Methode evidenzbasiert einsetzbar. Das CTG lässt auf den aktuellen Zustand des Feten rückschließen und erfolgt ohne Wehenbelastung (Ruhe-CTG = Non-Stress-Test).

Mittels Ultraschall kann relativ schnell und einfach die Fruchtwassermenge bestimmt werden. Ziel ist es, Fälle mit einer Oligohydramnie zu selektionieren. Die 2 am häufigsten verwendeten Methoden sind der Fruchtwasserindex und das größte Fruchtwasserdepot. Nach dem Termin definiert sich die Oligohydram-

nie im Ultraschall entweder als Fruchtwasserindex < 5 cm oder als größtes vertikales Fruchtwasserdepot < 3 cm.

Diskutiert wird der Einsatz der Doppler-Sonografie zur Überwachung von Schwangerschaften nach dem errechneten Termin. Eine endgültige Beurteilung der Wertigkeit der Doppler-Indices bei risikoarmen Terminüberschreitungen ist zurzeit noch nicht möglich, sodass diese Methode ohne andere Indikationen nicht in der Routine eingesetzt werden sollte.

#### 3.4 Empfehlungen zum klinischen Management für risikoarme Schwangerschaften

##### 3.4.1 37 + 0 bis 39 + 6 Schwangerschaftswochen

Bei komplikationslosen Schwangerschaften besteht während dieser Periode kein Anlass zur Empfehlung einer Geburtseinleitung. Die Überwachung sollte den Vorgaben der Mutterschaftsrichtlinien entsprechen.

**Bei einem mütterlichen Alter von über 40 Jahren kann ab 39 + 0 SSW in Übereinstimmung mit der Empfehlung der RCOG (RCOG 2013) eine Geburtseinleitung angeboten werden (EL IV).**

##### 3.4.2 40 + 0 bis 40 + 6 Schwangerschaftswochen

Mit Erreichen des errechneten Geburtstermins sollte noch einmal überprüft werden, ob tatsächlich eine risikoarme Schwangerschaft vorliegt. **Hierzu ist eine Ultraschallkontrolle mit fetaler Gewichtsschätzung und Fruchtwassermengenbestimmung zum Ausschluss einer Oligohydramnie oder einer bisher nicht erkannten IUGR geeignet (EL IV).**

Ergeben sich aus der aktuellen Untersuchung und Anamnese keine Gründe für eine Schwangerschaftsbeendigung, so kann unter Berücksichtigung der unter 3.1–3.3 aufgeführten Empfehlungen bis 40 + 6 SSW zugewartet werden. Unabhängig davon ist **eine Schwangerschaftsbeendigung dann indiziert, wenn aktuelle Ergebnisse der Überwachung von Mutter und Kind eine Gefährdung anzeigen.**

Für den Fall, dass sich die Schwangere für ein Abwarten über den errechneten Termin hinaus entscheidet, ist in Deutschland, Österreich und der Schweiz die Überwachung des Feten mittels CTG ab 40 + 0 SSW auch bei risikoarmen Schwangerschaften Versorgungsrealität, obwohl für einen Benefit keine durch prospektiv randomisierte Studien belegbare Evidenz besteht. Die aktuelle AWMF-Leitlinie „Anwendung des CTG während Schwangerschaft und Geburt“ sieht eine Indikation für ein CTG bei Terminüberschreitung ohne zusätzliche Risiken erst ab 41 + 0 SSW vor. Die Autoren sind der Meinung, dass jedoch auf Basis der realen Situation das CTG auch bei risikoarmen Schwangerschaften ab dem errechneten Termin durchgeführt werden sollte (Good Clinical Practice).

##### 3.4.3 41 + 0 bis 41 + 6 Schwangerschaftswochen

Das aktuelle Cochrane-Review aus dem Jahr 2012 zeigt, dass sich mit einer Einleitung ab 41 + 0

- ▶ die perinatale Mortalität signifikant verringert (RR 0,31; 95%-KI 0,12–0,81),
- ▶ das Risiko für ein Mekoniumaspirationssyndrom signifikant verringert (RR 0,50; 95%-KI 0,34–0,73),
- ▶ das Risiko für ein Geburtsgewicht über 4000 g signifikant vermindert (RR 0,73; 95%-KI 0,64–0,84) und
- ▶ die Sectiorate signifikant vermindert (RR 0,89; 95%-KI 0,81–0,97).

**Die Autoren dieser Leitlinie empfehlen deshalb, ab 41 + 0 SSW eine Geburtseinleitung anzubieten, spätestens ab 41 + 3 SSW zu empfehlen (EL I).**

Treten eine oder mehrere der moderaten Risiken hinzu, so wird im Einzelfall diese Empfehlung zur Geburtseinleitung eher mit 41 + 0 ausgesprochen werden. Für den Fall, dass sich die Schwangere nach Aufklärung und Beratung für ein Zuwarten bis 41 + 6 SSW entscheidet, kann bei fehlenden Risiken und normaler Fruchtwassermenge unter 2-tägigen Kontrollen (NST + Fruchtwassermenge) bis 41 + 6 SSW zugewartet werden, ohne dass das Risiko für einen IUFT gegenüber der Vorwoche ansteigt. Im Einzelfall können, bei Wunsch nach intensiverer Überwachung im Rahmen einer individualisierten Vorgehens, auch kürzere Intervalle festgelegt werden.

Die Beratung soll auch die Information für die Schwangere enthalten, dass eine Überschreitung von 42 + 0 SSW vermieden werden soll und deshalb spätestens dann die Beendigung der Schwangerschaft durch Einleitung oder Sectio caesarea indiziert ist.

### 3.4.4 Ab 42 + 0 SSW

**Ab  $\geq 42 + 0$  SSW ist eine Einleitung oder Beendigung der Schwangerschaft per Sectio caesarea auch ohne das Vorliegen anderer Risikofaktoren indiziert (EL Ia).** Das Risiko für einen IUFT steigt deutlich an. Ebenso ist die neonatale Morbidität durch Schulterdystokie, Mekoniumaspirationssyndrom, peripartale Asphyxie und Pneumonie signifikant erhöht. Als Folge der perinatalen Morbidität ist auch die neonatale Mortalität erhöht (EL IIa). Diese Risiken sollen bei der Aufklärung der Schwangeren erwähnt werden.

## 4 Prävention

Regelmäßiger Koitus um den Termin hatte in einer Studie eine Reduktion der Schwangerschaftsdauer  $> 41 + 0$  Wochen und eine geringere Rate an Geburtseinleitungen zur Folge (EL IIa). Das Cochrane-Review sieht hingegen keinen gesicherten Effekt.

Eine prophylaktische wöchentliche Eipollösung ab 38 SSW („stripping“) ist möglich. Obgleich in einigen Studien ein Nutzen ohne Risiken gezeigt werden konnte, sollte diese Maßnahme wegen der möglichen Schmerzhaftigkeit speziellen Fällen vorbehalten bleiben.

## 5 Anhang: Grafisches Schema des empfohlenen Vorgehens bei Terminüberschreitung und risikoarmer Einlingsschwangerschaft

Bei neu aufgetretenen Risiken oder pathologischen Untersuchungsbefunden (z.B. Oligohydramnion) ist individuell nach klinischen Gesichtspunkten zu entscheiden (Einleitung/Sectio/intensivierte biophysikalische Überwachung/stationäre Überwachung etc.) (Abb. 2).

### Zitierweise

National German Guideline (S1): Management of late-term and post-term pregnancy, AWMF Registry No.015/065. Geburtsh Frauenheilk 2014; 74: 1099–1103

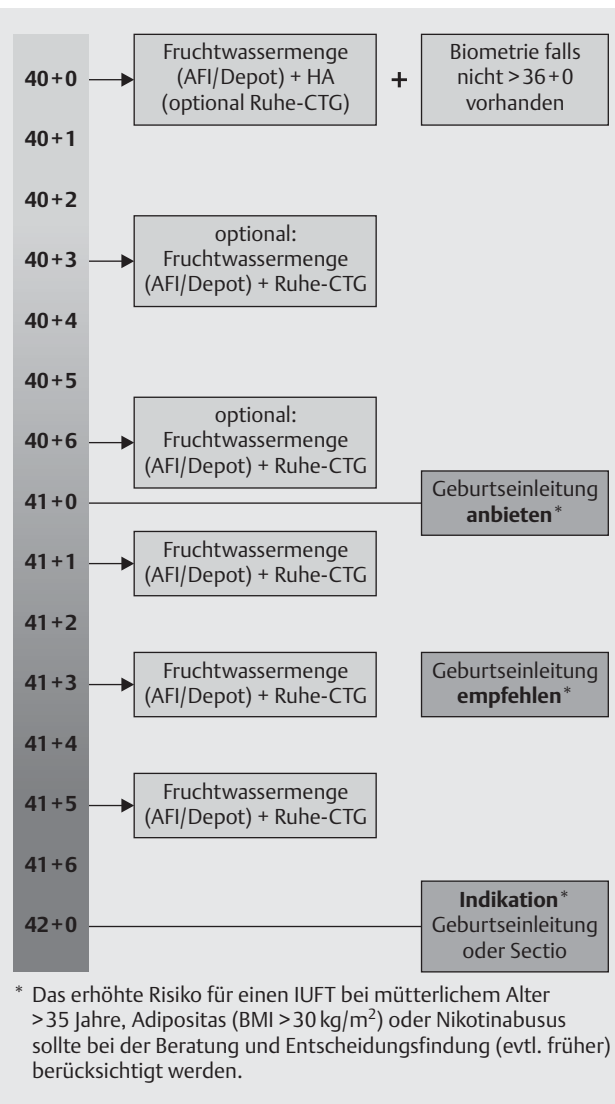

Abb. 2

### Institute

- <sup>1</sup> Frauenklinik Klinikum Sindelfingen-Böblingen, Sindelfingen
- <sup>2</sup> Universitätsfrauenklinik Tübingen, Tübingen
- <sup>3</sup> Frauenklinik Klinikum Saarbrücken, Saarbrücken
- <sup>4</sup> Universitätsfrauenklinik Salzburg, Salzburg
- <sup>5</sup> Frauenklinik Medizinische Universität Wien, Wien, Österreich
- <sup>6</sup> Universitätsfrauenklinik Bonn, Bonn
- <sup>7</sup> Frauenklinik HSK Wiesbaden, Wiesbaden
- <sup>8</sup> Frauenklinik Landeskrankenhaus Kirchdorf, Kirchdorf, Österreich
- <sup>9</sup> Frauenklinik Diakonie Neuendettelsau, Neuendettelsau
- <sup>10</sup> Frauenklinik Eichsfeld Klinikum, Heiligenstadt
- <sup>11</sup> Praxis Dr. König, Steinbach
- <sup>12</sup> Geburtsmedizin Vivantes Klinikum Neukölln, Berlin
- <sup>13</sup> Universitätsfrauenklinik Ulm, Ulm
- <sup>14</sup> Universitätsfrauenklinik TU München, München
- <sup>15</sup> Universitätsfrauenklinik Inselspital Bern, Bern, Schweiz
- <sup>16</sup> Frauenklinik Holweide Köln, Köln

## Literatur

Das komplette Literaturverzeichnis kann in der Langfassung der Leitlinie auf der Homepage der AWMF ([www.awmf.org](http://www.awmf.org)) eingesehen werden.

Die Gültigkeit der Leitlinie wurde durch den Vorstand der DGGG und die DGGG Leitlinienkommission im Februar 2014 bestätigt. Die Gültigkeitsdauer der Leitlinie geht bis 01/2017.

Die „Leitlinien“ der Wissenschaftlichen Medizinischen Fachgesellschaften sind systematisch entwickelte Hilfen für Ärzte zur Entscheidungsfindung in spezifischen Situationen. Sie beruhen auf aktuellen wissenschaftlichen Erkenntnissen und in der Praxis bewährten Verfahren und sorgen für mehr Sicherheit in der Medizin, sollen aber auch ökonomische Aspekte berücksichtigen. Die „Leitlinien“ sind für Ärzte rechtlich nicht bindend und haben daher weder haftungsbegründende noch haftungsbefreiende Wirkung. Die AWMF erfasst und publiziert die Leitlinien der Fachgesellschaften mit größtmöglicher Sorgfalt – dennoch kann die AWMF für die Richtigkeit des Inhalts keine Verantwortung übernehmen. Insbesondere bei Dosierungsangaben sind stets die Angaben der Hersteller zu beachten!

© Deutsche Gesellschaft für Gynäkologie und Geburtshilfe  
**Autorisiert für elektronische Publikation: AWMF online**

|                                                  |                                                                                                                                                                                                                                                                                                                                                                                                                                                                                                                                                                                                                                                                                                                                                                                    |
|--------------------------------------------------|------------------------------------------------------------------------------------------------------------------------------------------------------------------------------------------------------------------------------------------------------------------------------------------------------------------------------------------------------------------------------------------------------------------------------------------------------------------------------------------------------------------------------------------------------------------------------------------------------------------------------------------------------------------------------------------------------------------------------------------------------------------------------------|
| Erstellungsdatum                                 | 02/2010                                                                                                                                                                                                                                                                                                                                                                                                                                                                                                                                                                                                                                                                                                                                                                            |
| Überarbeitung von                                | 02/2014                                                                                                                                                                                                                                                                                                                                                                                                                                                                                                                                                                                                                                                                                                                                                                            |
| nächste Überprüfung geplant                      | 01/2017                                                                                                                                                                                                                                                                                                                                                                                                                                                                                                                                                                                                                                                                                                                                                                            |
| Langversion                                      | Vorgehen bei Terminüberschreitung und Übertragung; AWMF-Register Nr. 015/065; Klassifikation: S1; Stand: 28.02.2014, gültig bis 31.01.2017; <a href="http://www.awmf.org/">http://www.awmf.org/</a>                                                                                                                                                                                                                                                                                                                                                                                                                                                                                                                                                                                |
| Leitlinienreport                                 | Leitlinienreport zur S1-Leitlinie 015/065: Vorgehen bei Terminüberschreitung und Übertragung, Stand: 02/2014; <a href="http://www.awmf.org/">http://www.awmf.org/</a>                                                                                                                                                                                                                                                                                                                                                                                                                                                                                                                                                                                                              |
| Interessenkonflikterklärung                      | Alle Teilnehmer der Kommission unterzeichneten eine Erklärung zu potenziellen Interessenkonflikten. Potenzielle Col wurden hinsichtlich ihrer Relevanz für die Leitlinieninhalte bewertet. Die Mitglieder gaben keine Berührungen zu Dritten an, die für die Leitlinie von Relevanz sein könnten. Col-Tabelle unter <a href="http://www.awmf.org/einsehbar">http://www.awmf.org/einsehbar</a> .                                                                                                                                                                                                                                                                                                                                                                                    |
| Dia-Version                                      | Vorgehen bei Terminüberschreitung und Übertragung. <a href="http://www.awmf.org/">http://www.awmf.org/</a>                                                                                                                                                                                                                                                                                                                                                                                                                                                                                                                                                                                                                                                                         |
| Beteiligte Fachgesellschaften und Organisationen | <ul style="list-style-type: none"> <li>▶ Arbeitsgemeinschaft der Wissenschaftlichen Medizinischen Fachgesellschaften</li> <li>▶ Deutsche Gesellschaft für Gynäkologie und Geburtshilfe</li> <li>▶ Arbeitsgemeinschaft Materno-fetale Medizin</li> <li>▶ Deutsche Gesellschaft für Perinatale Medizin</li> <li>▶ Österreichische Gesellschaft für Gynäkologie und Geburtshilfe</li> <li>▶ Schweizerische Gesellschaft für Gynäkologie und Geburtshilfe</li> </ul>                                                                                                                                                                                                                                                                                                                   |
| Autoren der letzten Überarbeitung                | <ul style="list-style-type: none"> <li>▶ PD Dr. Harald Abele, Tübingen</li> <li>▶ Dr. Clemens Bartz, Saarbrücken</li> <li>▶ Prof. Dr. Thorsten Fischer, Salzburg</li> <li>▶ Dr. Maximilian Franz, Wien</li> <li>▶ Prof. Dr. Ulrich Gembruch, Bonn</li> <li>▶ PD Dr. Markus Gonser, Wiesbaden</li> <li>▶ Prof. Dr. Kurt Heim, Kirchdorf</li> <li>▶ Prof. Dr. Franz Kainer, Nürnberg</li> <li>▶ Dr. Annegret Kiefer, Heiligenstadt</li> <li>▶ Dr. Klaus König, Steinbach</li> <li>▶ Dr. Babette Ramsauer, Berlin</li> <li>▶ PD Dr. Frank Reister, Ulm</li> <li>▶ Prof. Dr. K. T. M. Schneider, München</li> <li>▶ Prof. Dr. Daniel Surbek, Bern</li> <li>▶ Prof. Dr. Klaus Vetter, Berlin</li> <li>▶ Prof. Friedrich Wolff, Köln</li> <li>▶ PD Dr. Erich Weiss, Böblingen</li> </ul> |
